# Supplementary material for: Differential translational control of 5′ IRE-containing mRNA in response to dietary iron deficiency and acute iron overload
Source: Royal Society of Chemistry journal article supplement (doi:10.1039/d0mt00192a), 2020-01-01
Supplement: d0mt00192a1.pdf [file d0mt00192a1.pdf]

Garza et al

Table of Contents for

Supplemental Data

EMSA analysis

| Topic                                     | Pages |
|-------------------------------------------|-------|
| EMSA from acute iron overload             | 1-5   |
| EMSA from iron deficiency studies 1 and 2 | 6-10  |

Iron injection  
04

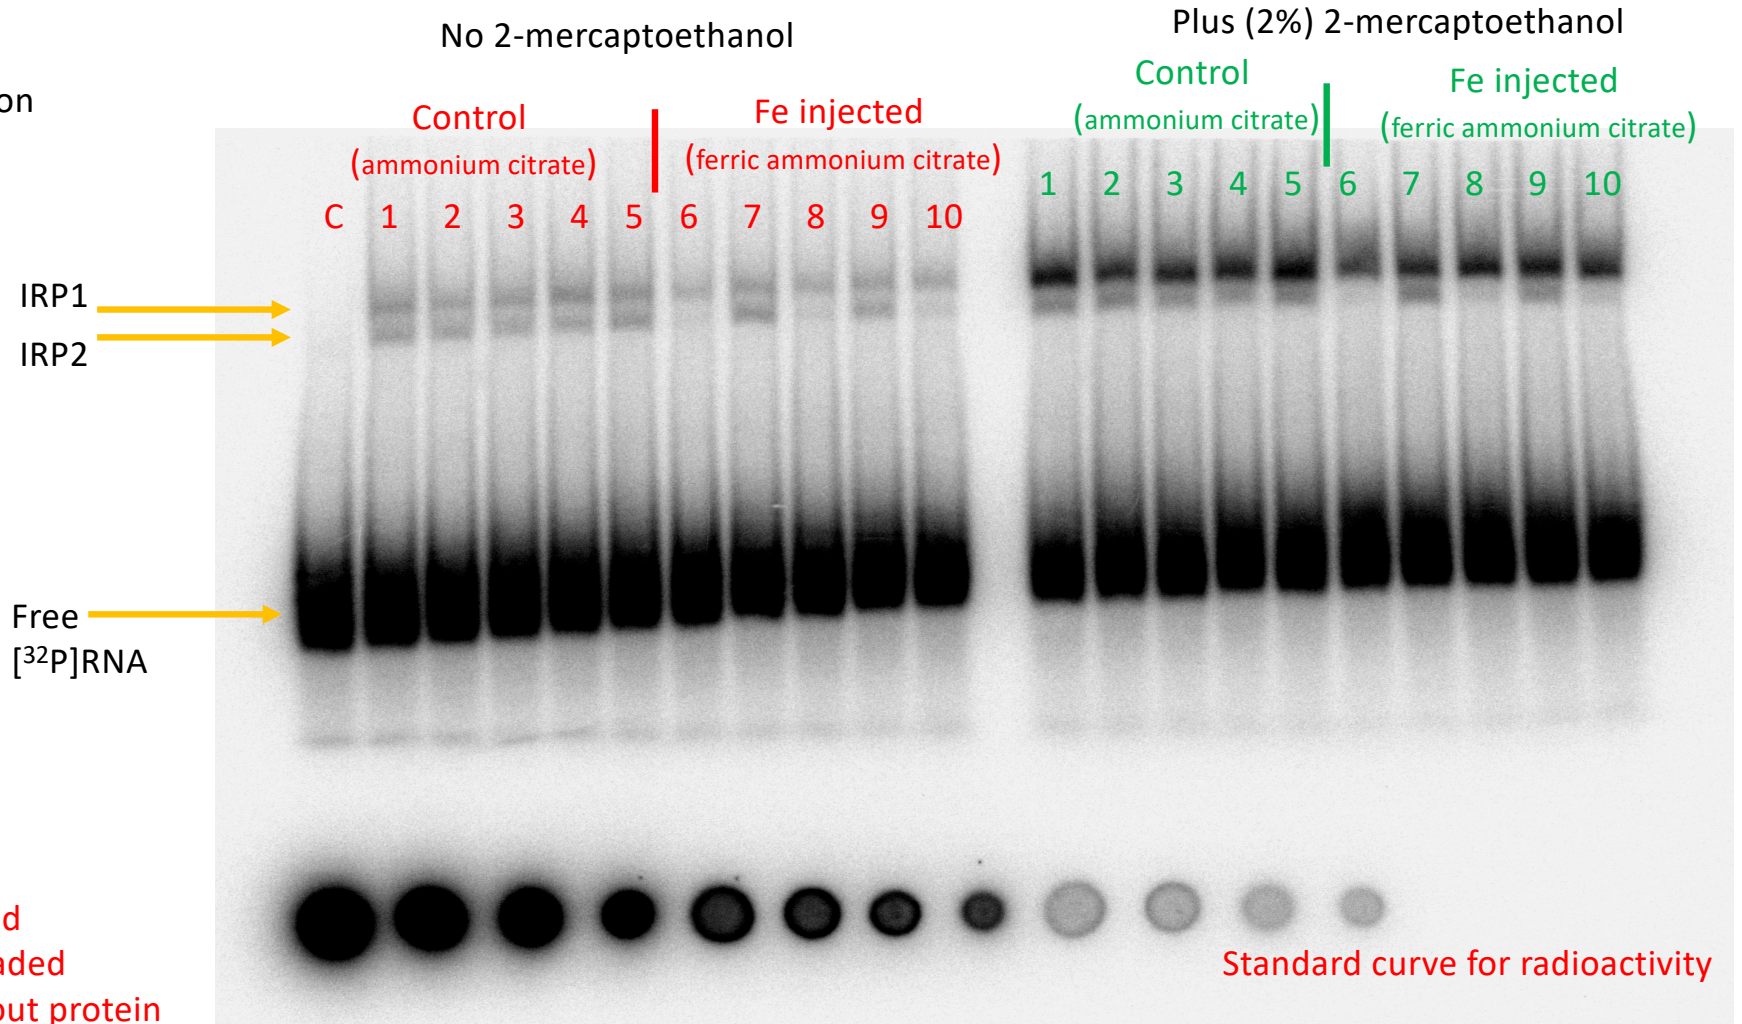

Lane marked  
C is RNA loaded  
alone without protein

Standard curve for radioactivity

Iron injection  
o5

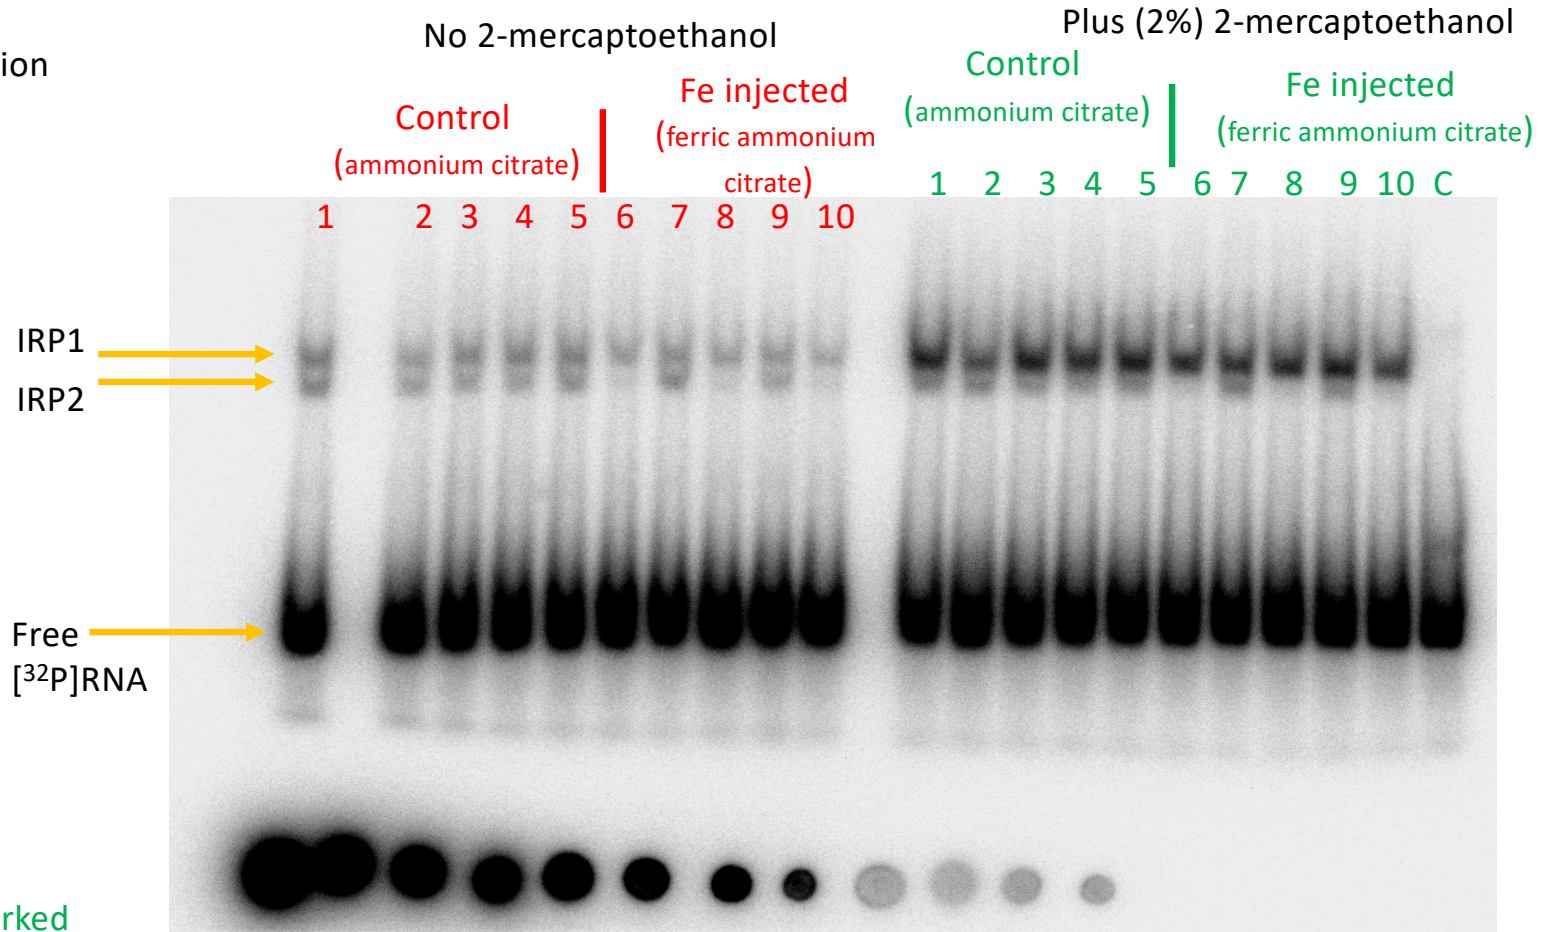

Lane marked  
C is RNA loaded  
alone without protein

Standard curve for radioactivity

## Fe-Inj Summary

|           | Gel1-IRP1 | Gel2-IRP1 | Mean IRP1 | Gel1-IRP2 | Gel2-IRP2 | Mean IRP2 | Gel1-BMEIRP1 |
|-----------|-----------|-----------|-----------|-----------|-----------|-----------|--------------|
| <b>1</b>  | 27.41     | 26.39     | 26.90     | 19.49     | 17.07     | 18.28     | 167.55       |
| <b>3</b>  | 20.55     | 14.35     | 17.45     | 18.00     | 10.01     | 14.01     | 113.86       |
| <b>5</b>  | 26.60     | 19.03     | 22.82     | 16.50     | 8.81      | 12.66     | 122.98       |
| <b>7</b>  | 33.25     | 20.71     | 26.98     | 15.73     | 9.39      | 12.56     | 128.60       |
| <b>9</b>  | 27.13     | 19.99     | 23.56     | 20.34     | 11.13     | 15.74     | 168.85       |
| <b>2</b>  | 13.58     | 12.34     | 12.96     | 4.85      | 2.22      | 3.54      | 116.04       |
| <b>4</b>  | 22.96     | 19.77     | 21.37     | 21.54     | 13.31     | 17.43     | 115.79       |
| <b>6</b>  | 16.10     | 12.30     | 14.20     | 7.50      | 2.58      | 5.04      | 142.46       |
| <b>8</b>  | 19.30     | 13.49     | 16.40     | 15.47     | 7.71      | 11.59     | 136.87       |
| <b>10</b> | 17.78     | 8.85      | 13.32     | 5.50      | 2.87      | 4.19      | 133.93       |

|         | IRP1     | IRP2     | SD IRP1 | SD IRP2 | SEM IRP1 | SEM IRP2 |
|---------|----------|----------|---------|---------|----------|----------|
| Control | 23.54    | 14.65    | 3.90    | 2.40    | 1.74     | 1.08     |
| Fe-Inj  | 15.65    | 8.36     | 3.46    | 6.01    | 1.55     | 2.69     |
|         | BME-IRP1 | BME-IRP2 | SD IRP1 | SD IRP2 | SEM IRP1 | SEM IRP2 |
| Control | 115.81   | 23.60    | 18.47   | 2.04    | 8.26     | 0.91     |
| Fe-Inj  | 105.65   | 15.92    | 9.45    | 6.74    | 4.23     | 3.02     |

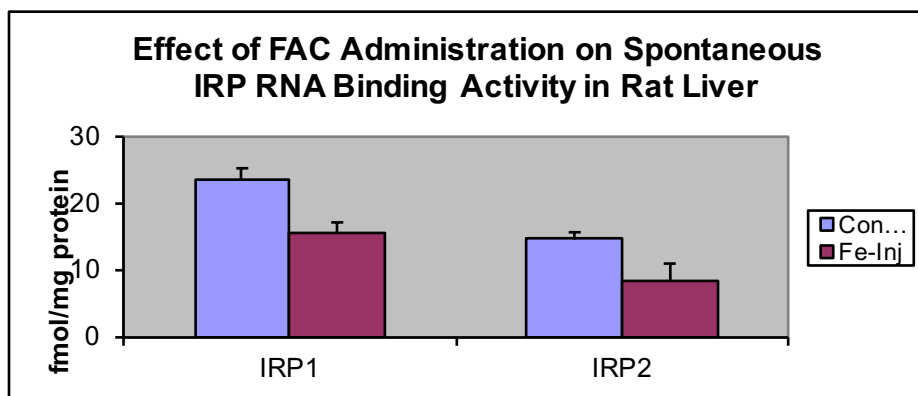

This is the so-called spontaneous IRP RNA binding activity - the active IRP in cells/tissues - as isolated. This is what we reported in the manuscript (but as the sum of IRP1 + IRP2).

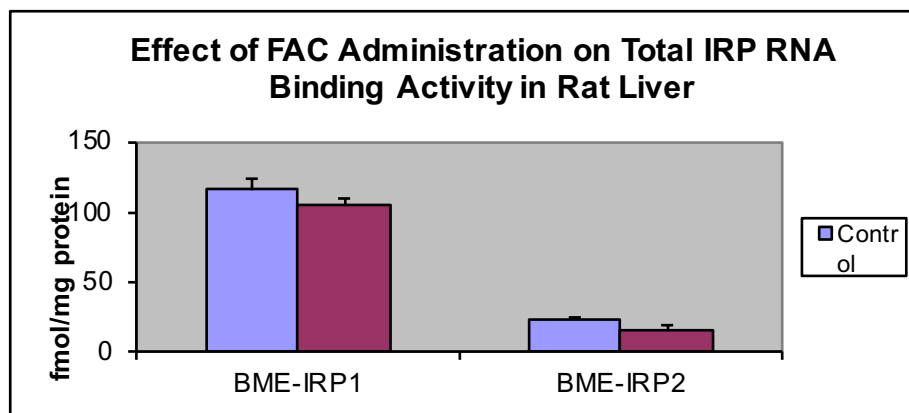

This is the 2-mercaptoethanol activated IRP binding activity

|                                   |                 |                        |                |                      |             |                |             |           |            |            |                 |  |  |  |  |  |  |  |      |  |  |
|-----------------------------------|-----------------|------------------------|----------------|----------------------|-------------|----------------|-------------|-----------|------------|------------|-----------------|--|--|--|--|--|--|--|------|--|--|
| <b>SA on RNA Calibration Date</b> |                 |                        |                | 6647                 |             |                |             |           |            |            |                 |  |  |  |  |  |  |  |      |  |  |
| <b>Date of Calibration</b>        |                 |                        |                | 1/10/03              |             |                |             |           |            |            |                 |  |  |  |  |  |  |  |      |  |  |
| <b>Date Counted</b>               |                 |                        |                | 1/14/03              |             |                |             |           |            |            |                 |  |  |  |  |  |  |  |      |  |  |
| <b>Difference</b>                 |                 |                        |                | 4                    |             |                |             |           |            |            |                 |  |  |  |  |  |  |  |      |  |  |
| <b>SA on Counting Date</b>        |                 |                        |                | 5476                 |             |                |             |           |            |            |                 |  |  |  |  |  |  |  |      |  |  |
|                                   | <b>CPM A</b>    | <b>fmol</b>            | <b>DLU</b>     |                      |             |                |             |           |            |            |                 |  |  |  |  |  |  |  |      |  |  |
|                                   | 143295          | 26.169113              | 172887121      |                      |             |                |             |           |            |            |                 |  |  |  |  |  |  |  |      |  |  |
|                                   | 114843          | 20.973093              | 138856952      |                      |             |                |             |           |            |            |                 |  |  |  |  |  |  |  |      |  |  |
|                                   | 89850           | 16.408771              | 106342408      |                      |             |                |             |           |            |            |                 |  |  |  |  |  |  |  |      |  |  |
|                                   | 59387           | 10.845494              | 62065056       |                      |             |                |             |           |            |            |                 |  |  |  |  |  |  |  |      |  |  |
|                                   | 21583           | 3.941575               | 22934083       |                      |             |                |             |           |            |            |                 |  |  |  |  |  |  |  |      |  |  |
|                                   | 17271           | 3.154100               | 18871786       |                      |             |                |             |           |            |            |                 |  |  |  |  |  |  |  |      |  |  |
|                                   | 13250           | 2.419769               | 13716635       |                      |             |                |             |           |            |            |                 |  |  |  |  |  |  |  |      |  |  |
|                                   | 8682            | 1.585542               | 8553843        |                      |             |                |             |           |            |            |                 |  |  |  |  |  |  |  |      |  |  |
|                                   | 3465            | 0.632792               | 3417262        |                      |             |                |             |           |            |            |                 |  |  |  |  |  |  |  |      |  |  |
|                                   | 2823            | 0.515548               | 2814772        |                      |             |                |             |           |            |            |                 |  |  |  |  |  |  |  |      |  |  |
|                                   | 2068            | 0.377667               | 1867842        |                      |             |                |             |           |            |            |                 |  |  |  |  |  |  |  |      |  |  |
|                                   | 1442            | 0.263344               | 1304548        |                      |             |                |             |           |            |            |                 |  |  |  |  |  |  |  |      |  |  |
|                                   |                 |                        |                |                      |             |                |             |           |            |            |                 |  |  |  |  |  |  |  |      |  |  |
|                                   |                 |                        |                |                      |             |                |             |           |            |            |                 |  |  |  |  |  |  |  |      |  |  |
| <b>dlu/fmol</b>                   | <b>fmol/dlu</b> | <b>Actual fmol/dlu</b> |                |                      |             |                |             |           |            |            |                 |  |  |  |  |  |  |  |      |  |  |
| 0.661512679                       | 1.51169         | 1.51169E-07            |                |                      |             |                |             |           |            |            |                 |  |  |  |  |  |  |  |      |  |  |
| <b>IRP1</b>                       |                 |                        |                |                      |             |                |             |           |            |            |                 |  |  |  |  |  |  |  | 7.58 |  |  |
| <b>Gross DLU</b>                  |                 | <b>CF</b>              | <b>Net DLU</b> | <b>Corrected DLU</b> | <b>fmol</b> | <b>fmol/mg</b> | <b>Mean</b> | <b>SD</b> | <b>SEM</b> | <b>2SD</b> | <b>Mean+2SD</b> |  |  |  |  |  |  |  |      |  |  |
| <b>Fe-Inj04</b>                   |                 | <b>67557147</b>        |                |                      |             |                |             |           |            |            |                 |  |  |  |  |  |  |  |      |  |  |
| 1                                 | 68458379        | 0.987                  | 1391784        | 1373462              | 0.2076244   | 27.41          | 26.99       | 4.5       | 2.0        | 9.0        | 36.0            |  |  |  |  |  |  |  |      |  |  |
| 3                                 | 69206004        | 0.976                  | 1055175        | 1030035              | 0.1557090   | 20.55          |             |           |            |            |                 |  |  |  |  |  |  |  |      |  |  |
| 5                                 | 65059762        | 1.038                  | 1283612        | 1332885              | 0.2014904   | 26.60          |             |           |            |            |                 |  |  |  |  |  |  |  |      |  |  |
| 7                                 | 69411838        | 0.973                  | 1711928        | 1666185              | 0.2518750   | 33.25          |             |           |            |            |                 |  |  |  |  |  |  |  |      |  |  |
| 9                                 | 68696170        | 0.983                  | 1382331        | 1359411              | 0.2055004   | 27.13          |             |           |            |            |                 |  |  |  |  |  |  |  |      |  |  |
| 2                                 | 67522781        | 1.001                  | 680349         | 680695               | 0.1028998   | 13.58          | 17.94       | 3.5       | 1.6        | 7.0        | 25.0            |  |  |  |  |  |  |  |      |  |  |
| 4                                 | 67171703        | 1.006                  | 1144010        | 1150575              | 0.1739308   | 22.96          |             |           |            |            |                 |  |  |  |  |  |  |  |      |  |  |
| 6                                 | 66797808        | 1.011                  | 797928         | 806999               | 0.1219929   | 16.10          |             |           |            |            |                 |  |  |  |  |  |  |  |      |  |  |
| 8                                 | 68253525        | 0.990                  | 977119         | 967150               | 0.1462027   | 19.30          |             |           |            |            |                 |  |  |  |  |  |  |  |      |  |  |
| 10                                | 64993497        | 1.039                  | 857151         | 890961               | 0.1346854   | 17.78          |             |           |            |            |                 |  |  |  |  |  |  |  |      |  |  |
| <b>IRP2</b>                       |                 |                        |                |                      |             |                |             |           |            |            |                 |  |  |  |  |  |  |  | 7.6  |  |  |
| <b>Gross DLU</b>                  |                 | <b>CF</b>              | <b>Net DLU</b> | <b>Corrected DLU</b> | <b>fmol</b> | <b>fmol/mg</b> | <b>Mean</b> | <b>SD</b> | <b>SEM</b> | <b>2SD</b> | <b>Mean+2SD</b> |  |  |  |  |  |  |  |      |  |  |
| <b>Fe-Inj04</b>                   |                 | <b>67557147</b>        |                |                      |             |                |             |           |            |            |                 |  |  |  |  |  |  |  |      |  |  |
| 1                                 | 68458379        | 0.987                  | 989884         | 976852               | 0.1476695   | 19.49          | 18.01       | 1.9       | 0.9        | 3.9        | 21.9            |  |  |  |  |  |  |  |      |  |  |
| 3                                 | 69206004        | 0.976                  | 923848         | 901837               | 0.1363295   | 18.00          |             |           |            |            |                 |  |  |  |  |  |  |  |      |  |  |
| 5                                 | 65059762        | 1.038                  | 796258         | 826823               | 0.1249898   | 16.50          |             |           |            |            |                 |  |  |  |  |  |  |  |      |  |  |
| 7                                 | 69411838        | 0.973                  | 809936         | 788294               | 0.1191654   | 15.73          |             |           |            |            |                 |  |  |  |  |  |  |  |      |  |  |
| 9                                 | 68696170        | 0.983                  | 1036414        | 1019230              | 0.1540756   | 20.34          |             |           |            |            |                 |  |  |  |  |  |  |  |      |  |  |
| 2                                 | 67522781        | 1.001                  | 243135         | 243259               | 0.0367731   | 4.85           | 10.97       | 7.3       | 3.3        | 14.5       | 25.5            |  |  |  |  |  |  |  |      |  |  |
| 4                                 | 67171703        | 1.006                  | 1073367        | 1079526              | 0.1631905   | 21.54          |             |           |            |            |                 |  |  |  |  |  |  |  |      |  |  |
| 6                                 | 66797808        | 1.011                  | 371504         | 375727               | 0.0567982   | 7.50           |             |           |            |            |                 |  |  |  |  |  |  |  |      |  |  |
| 8                                 | 68253525        | 0.990                  | 783296         | 775304               | 0.1172017   | 15.47          |             |           |            |            |                 |  |  |  |  |  |  |  |      |  |  |
| 10                                | 64993497        | 1.039                  | 265012         | 275465               | 0.0416417   | 5.50           |             |           |            |            |                 |  |  |  |  |  |  |  |      |  |  |
| <b>IRP1+2%BME</b>                 |                 |                        |                |                      |             |                |             |           |            |            |                 |  |  |  |  |  |  |  | 7.6  |  |  |
| <b>Gross DLU</b>                  |                 | <b>CF</b>              | <b>Net DLU</b> | <b>Corrected DLU</b> | <b>fmol</b> | <b>fmol/mg</b> | <b>Mean</b> | <b>SD</b> | <b>SEM</b> | <b>2SD</b> | <b>Mean+2SD</b> |  |  |  |  |  |  |  |      |  |  |
| <b>Fe-Inj04</b>                   |                 | <b>65005981</b>        |                |                      |             |                |             |           |            |            |                 |  |  |  |  |  |  |  |      |  |  |
| 1                                 | 62024445        | 1.048                  | 8011777        | 8396906              | 1.2693492   | 167.55         | 140.37      | 26.0      | 11.6       | 51.9       | 192.3           |  |  |  |  |  |  |  |      |  |  |
| 3                                 | 66384453        | 0.979                  | 5827004        | 5706006              | 0.8625695   | 113.86         |             |           |            |            |                 |  |  |  |  |  |  |  |      |  |  |
| 5                                 | 62803487        | 1.035                  | 5954109        | 6162917              | 0.9316401   | 122.98         |             |           |            |            |                 |  |  |  |  |  |  |  |      |  |  |
| 7                                 | 64242019        | 1.012                  | 6368878        | 6444616              | 0.9742242   | 128.60         |             |           |            |            |                 |  |  |  |  |  |  |  |      |  |  |
| 9                                 | 69349809        | 0.937                  | 9027274        | 8461837              | 1.2791648   | 168.85         |             |           |            |            |                 |  |  |  |  |  |  |  |      |  |  |
| 2                                 | 60428467        | 1.076                  | 5405703        | 5815190              | 0.8790746   | 116.04         | 129.02      | 12.3      | 5.5        | 24.7       | 153.7           |  |  |  |  |  |  |  |      |  |  |
| 4                                 | 68423402        | 0.950                  | 6108062        | 5802994              | 0.8772309   | 115.79         |             |           |            |            |                 |  |  |  |  |  |  |  |      |  |  |
| 6                                 | 65326467        | 0.995                  | 7174755        | 7139556              | 1.0792773   | 142.46         |             |           |            |            |                 |  |  |  |  |  |  |  |      |  |  |
| 8                                 | 68812305        | 0.945                  | 7260664        | 6859043              | 1.0368726   | 136.87         |             |           |            |            |                 |  |  |  |  |  |  |  |      |  |  |
| 10                                | 62264958        | 1.044                  | 6428985        | 6712001              | 1.0146444   | 133.93         |             |           |            |            |                 |  |  |  |  |  |  |  |      |  |  |
| <b>IRP2+2%BME</b>                 |                 |                        |                |                      |             |                |             |           |            |            |                 |  |  |  |  |  |  |  | 7.6  |  |  |
| <b>Gross DLU</b>                  |                 | <b>CF</b>              | <b>Net DLU</b> | <b>Corrected DLU</b> | <b>fmol</b> | <b>fmol/mg</b> | <b>Mean</b> | <b>SD</b> | <b>SEM</b> | <b>2SD</b> | <b>Mean+2SD</b> |  |  |  |  |  |  |  |      |  |  |
| <b>Fe-Inj04</b>                   |                 | <b>65005981</b>        |                |                      |             |                |             |           |            |            |                 |  |  |  |  |  |  |  |      |  |  |
| 1                                 | 62024445        | 1.048                  | 1562395        | 1637500              | 0.2475387   | 32.68          | 30.38       | 2.6       | 1.2        | 5.2        | 35.6            |  |  |  |  |  |  |  |      |  |  |
| 3                                 | 66384453        | 0.979                  | 1600880        | 1567638              | 0.2369777   | 31.28          |             |           |            |            |                 |  |  |  |  |  |  |  |      |  |  |
| 5                                 | 62803487        | 1.035                  | 1278166        | 1322991              | 0.1999948   | 26.40          |             |           |            |            |                 |  |  |  |  |  |  |  |      |  |  |
| 7                                 | 64242019        | 1.012                  | 1446455        | 1463656              | 0.2212590   | 29.21          |             |           |            |            |                 |  |  |  |  |  |  |  |      |  |  |
| 9                                 | 69349809        | 0.937                  | 1728011        | 1619774              | 0.2448592   | 32.32          |             |           |            |            |                 |  |  |  |  |  |  |  |      |  |  |
| 2                                 | 60428467        | 1.076                  | 637155         | 685420               | 0.1036141   | 13.68          | 19.25       | 8.1       | 3.6        | 16.2       | 35.4            |  |  |  |  |  |  |  |      |  |  |
| 4                                 | 68423402        | 0.950                  | 1541654        | 1464656              | 0.2214101   | 29.23          |             |           |            |            |                 |  |  |  |  |  |  |  |      |  |  |
| 6                                 | 65326467        | 0.995                  | 733103         | 729506               | 0.1102785   | 14.56          |             |           |            |            |                 |  |  |  |  |  |  |  |      |  |  |
| 8                                 | 68812305        | 0.945                  | 1419683        | 1341154              | 0.2027405   | 26.76          |             |           |            |            |                 |  |  |  |  |  |  |  |      |  |  |
| 10                                | 62264958        | 1.044                  | 577593         | 603020               | 0.0911577   | 12.03          |             |           |            |            |                 |  |  |  |  |  |  |  |      |  |  |

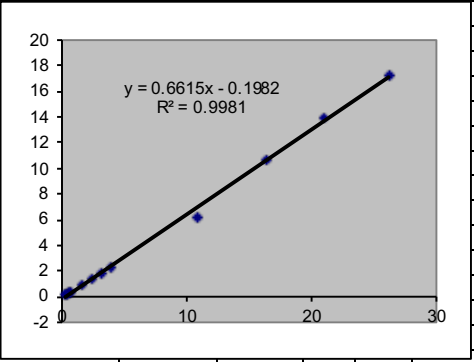

|                                   |                  |                        |             |                |                      |             |                |             |           |            |            |                 |  |  |  |  |  |
|-----------------------------------|------------------|------------------------|-------------|----------------|----------------------|-------------|----------------|-------------|-----------|------------|------------|-----------------|--|--|--|--|--|
| <b>SA on RNA Calibration Date</b> |                  |                        |             | 6647           |                      |             |                |             |           |            |            |                 |  |  |  |  |  |
| <b>Date of Calibration</b>        |                  |                        |             | 1/10/03        |                      |             |                |             |           |            |            |                 |  |  |  |  |  |
| <b>Date Counted</b>               |                  |                        |             | 1/14/03        |                      |             |                |             |           |            |            |                 |  |  |  |  |  |
| <b>Difference</b>                 |                  |                        |             | 4              |                      |             |                |             |           |            |            |                 |  |  |  |  |  |
| <b>SA on Counting Date</b>        |                  |                        |             | 5476           |                      |             |                |             |           |            |            |                 |  |  |  |  |  |
|                                   | <b>CPM A</b>     |                        | <b>fmol</b> |                | <b>DLU</b>           |             |                |             |           |            |            |                 |  |  |  |  |  |
| <b>OMIT</b>                       |                  |                        | 0.000000    |                |                      | 0.00000000  |                |             |           |            |            |                 |  |  |  |  |  |
| <b>OMIT</b>                       |                  |                        | 0.000000    |                |                      | 0.00000000  |                |             |           |            |            |                 |  |  |  |  |  |
|                                   | 83581            |                        | 15.263901   |                | 102453640            | 10.24536400 |                |             |           |            |            |                 |  |  |  |  |  |
|                                   | 54107            |                        | 9.881239    |                | 62412691             | 6.24126910  |                |             |           |            |            |                 |  |  |  |  |  |
|                                   | 15863            |                        | 2.896965    |                | 18244276             | 1.82442760  |                |             |           |            |            |                 |  |  |  |  |  |
|                                   | 13261            |                        | 2.421777    |                | 14735858             | 1.47358580  |                |             |           |            |            |                 |  |  |  |  |  |
|                                   | 10052            |                        | 1.835737    |                | 10871248             | 1.08712480  |                |             |           |            |            |                 |  |  |  |  |  |
|                                   | 5180             |                        | 0.945993    |                | 5653438              | 0.56534380  |                |             |           |            |            |                 |  |  |  |  |  |
|                                   | 1647             |                        | 0.300782    |                | 1727349              | 0.17273490  |                |             |           |            |            |                 |  |  |  |  |  |
|                                   | 1222             |                        | 0.223167    |                | 1255061              | 0.12550610  |                |             |           |            |            |                 |  |  |  |  |  |
|                                   | 1144             |                        | 0.208922    |                | 1165761              | 0.11657610  |                |             |           |            |            |                 |  |  |  |  |  |
|                                   | 747              |                        | 0.136420    |                | 779379               | 0.07793790  |                |             |           |            |            |                 |  |  |  |  |  |
|                                   |                  |                        |             |                |                      |             |                |             |           |            |            |                 |  |  |  |  |  |
| <b>dlu/fmol</b>                   | <b>fmol/dlu</b>  | <b>Actual fmol/dlu</b> |             |                |                      |             |                |             |           |            |            |                 |  |  |  |  |  |
| 0.662574683                       | 1.50926          | 1.50926E-07            |             |                |                      |             |                |             |           |            |            |                 |  |  |  |  |  |
|                                   |                  |                        |             |                |                      |             |                |             |           |            |            |                 |  |  |  |  |  |
| <b>IRP1</b>                       |                  |                        |             |                |                      |             |                |             |           |            | 7.58       |                 |  |  |  |  |  |
|                                   | <b>Gross DLU</b> | <b>CF</b>              |             | <b>Net DLU</b> | <b>Corrected DLU</b> | <b>fmol</b> | <b>fmol/mg</b> | <b>Mean</b> | <b>SD</b> | <b>SEM</b> | <b>2SD</b> | <b>Mean+2SD</b> |  |  |  |  |  |
| <b>Fe-Inj05</b>                   | <b>36955107</b>  |                        |             |                |                      |             |                |             |           |            |            |                 |  |  |  |  |  |
| 1                                 | 32933607         |                        | 1.122       | 1180330        | 1324459              | 0.1998958   | 26.39          | 20.09       | 4.3       | 1.9        | 8.6        | 28.7            |  |  |  |  |  |
| 3                                 | 35007818         |                        | 1.056       | 682576         | 720544               | 0.1087491   | 14.35          |             |           |            |            |                 |  |  |  |  |  |
| 5                                 | 36636811         |                        | 1.009       | 947070         | 955298               | 0.1441797   | 19.03          |             |           |            |            |                 |  |  |  |  |  |
| 7                                 | 38303222         |                        | 0.965       | 1077668        | 1039739              | 0.1569240   | 20.71          |             |           |            |            |                 |  |  |  |  |  |
| 9                                 | 40173956         |                        | 0.920       | 1090687        | 1003298              | 0.1514242   | 19.99          |             |           |            |            |                 |  |  |  |  |  |
| 2                                 | 39377518         |                        | 0.938       | 660202         | 619588               | 0.0935122   | 12.34          | 13.35       | 4.0       | 1.8        | 8.0        | 21.3            |  |  |  |  |  |
| 4                                 | 33251510         |                        | 1.111       | 893002         | 992466               | 0.1497893   | 19.77          |             |           |            |            |                 |  |  |  |  |  |
| 6                                 | 37629268         |                        | 0.982       | 628803         | 617537               | 0.0932027   | 12.30          |             |           |            |            |                 |  |  |  |  |  |
| 8                                 | 41183551         |                        | 0.897       | 754616         | 677137               | 0.1021979   | 13.49          |             |           |            |            |                 |  |  |  |  |  |
| 10                                | 35053806         |                        | 1.054       | 421365         | 444220               | 0.0670445   | 8.85           |             |           |            |            |                 |  |  |  |  |  |
| <b>IRP2</b>                       |                  |                        |             |                |                      |             |                |             |           |            |            |                 |  |  |  |  |  |
|                                   | <b>Gross DLU</b> | <b>CF</b>              |             | <b>Net DLU</b> | <b>Corrected DLU</b> | <b>fmol</b> | <b>fmol/mg</b> | <b>Mean</b> | <b>SD</b> | <b>SEM</b> | <b>2SD</b> | <b>Mean+2SD</b> |  |  |  |  |  |
| <b>Fe-Inj05</b>                   | <b>36955107</b>  |                        |             |                |                      |             |                |             |           |            |            |                 |  |  |  |  |  |
| 1                                 | 32933607         |                        | 1.122       | 763409         | 856628               | 0.1292878   | 17.07          | 11.28       | 3.3       | 1.5        | 6.7        | 18.0            |  |  |  |  |  |
| 3                                 | 35007818         |                        | 1.056       | 476017         | 502495               | 0.0758398   | 10.01          |             |           |            |            |                 |  |  |  |  |  |
| 5                                 | 36636811         |                        | 1.009       | 438211         | 442018               | 0.0667122   | 8.81           |             |           |            |            |                 |  |  |  |  |  |
| 7                                 | 38303222         |                        | 0.965       | 488435         | 471244               | 0.0711232   | 9.39           |             |           |            |            |                 |  |  |  |  |  |
| 9                                 | 40173956         |                        | 0.920       | 607373         | 558709               | 0.0843239   | 11.13          |             |           |            |            |                 |  |  |  |  |  |
| 2                                 | 39377518         |                        | 0.938       | 118679         | 111378               | 0.0168099   | 2.22           | 5.74        | 4.8       | 2.1        | 9.6        | 15.3            |  |  |  |  |  |
| 4                                 | 33251510         |                        | 1.111       | 601230         | 668196               | 0.1008484   | 13.31          |             |           |            |            |                 |  |  |  |  |  |
| 6                                 | 37629268         |                        | 0.982       | 131741         | 129381               | 0.0195270   | 2.58           |             |           |            |            |                 |  |  |  |  |  |
| 8                                 | 41183551         |                        | 0.897       | 431292         | 387010               | 0.0584100   | 7.71           |             |           |            |            |                 |  |  |  |  |  |
| 10                                | 35053806         |                        | 1.054       | 136754         | 144171               | 0.0217593   | 2.87           |             |           |            |            |                 |  |  |  |  |  |
| <b>IRP1+2%BME</b>                 |                  |                        |             |                |                      |             |                |             |           |            | 7.6        |                 |  |  |  |  |  |
|                                   | <b>Gross DLU</b> | <b>CF</b>              |             | <b>Net DLU</b> | <b>Corrected DLU</b> | <b>fmol</b> | <b>fmol/mg</b> | <b>Mean</b> | <b>SD</b> | <b>SEM</b> | <b>2SD</b> | <b>Mean+2SD</b> |  |  |  |  |  |
| <b>Fe-Inj05</b>                   | <b>40108411</b>  |                        |             |                |                      |             |                |             |           |            |            |                 |  |  |  |  |  |
| 1                                 | 40868496         |                        | 0.981       | 4891587        | 4800612              | 0.7245390   | 95.64          | 91.25       | 17.2      | 7.7        | 34.4       | 125.7           |  |  |  |  |  |
| 3                                 | 36905960         |                        | 1.087       | 2808680        | 3052398              | 0.4606874   | 60.81          |             |           |            |            |                 |  |  |  |  |  |
| 5                                 | 41219126         |                        | 0.973       | 5283735        | 5141356              | 0.7759663   | 102.43         |             |           |            |            |                 |  |  |  |  |  |
| 7                                 | 37930787         |                        | 1.057       | 4762745        | 5036176              | 0.7600919   | 100.33         |             |           |            |            |                 |  |  |  |  |  |
| 9                                 | 42336674         |                        | 0.947       | 5140269        | 4869726              | 0.7349702   | 97.02          |             |           |            |            |                 |  |  |  |  |  |
| 2                                 | 41880666         |                        | 0.958       | 3797956        | 3637239              | 0.5489553   | 72.46          | 82.28       | 8.5       | 3.8        | 17.1       | 99.4            |  |  |  |  |  |
| 4                                 | 39202849         |                        | 1.023       | 4014254        | 4106981              | 0.6198518   | 81.82          |             |           |            |            |                 |  |  |  |  |  |
| 6                                 | 40296154         |                        | 0.995       | 4429514        | 4408877              | 0.6654158   | 87.83          |             |           |            |            |                 |  |  |  |  |  |
| 8                                 | 41540129         |                        | 0.966       | 4854928        | 4687599              | 0.7074823   | 93.39          |             |           |            |            |                 |  |  |  |  |  |
| 10                                | 38903271         |                        | 1.031       | 3694976        | 3809438              | 0.5749448   | 75.89          |             |           |            |            |                 |  |  |  |  |  |
| <b>IRP2+2%BME</b>                 |                  |                        |             |                |                      |             |                |             |           |            |            |                 |  |  |  |  |  |
|                                   | <b>Gross DLU</b> | <b>CF</b>              |             | <b>Net DLU</b> | <b>Corrected DLU</b> | <b>fmol</b> | <b>fmol/mg</b> | <b>Mean</b> | <b>SD</b> | <b>SEM</b> | <b>2SD</b> | <b>Mean+2SD</b> |  |  |  |  |  |
| <b>Fe-Inj05</b>                   | <b>40108411</b>  |                        |             |                |                      |             |                |             |           |            |            |                 |  |  |  |  |  |
| 1                                 | 40868496         |                        | 0.981       | 881754         | 865355               | 0.1306049   | 17.24          | 16.81       | 2.1       | 0.9        | 4.2        | 21.0            |  |  |  |  |  |
| 3                                 | 36905960         |                        | 1.087       | 929108         | 1009730              | 0.1523949   | 20.12          |             |           |            |            |                 |  |  |  |  |  |
| 5                                 | 41219126         |                        | 0.973       | 754006         | 733688               | 0.1107329   | 14.62          |             |           |            |            |                 |  |  |  |  |  |
| 7                                 | 37930787         |                        | 1.057       | 777694         | 822342               | 0.1241131   | 16.38          |             |           |            |            |                 |  |  |  |  |  |
| 9                                 | 42336674         |                        | 0.947       | 832116         | 788320               | 0.1189783   | 15.71          |             |           |            |            |                 |  |  |  |  |  |
| 2                                 | 41880666         |                        | 0.958       | 425245         | 407250               | 0.0614648   | 8.11           | 12.58       | 5.5       | 2.4        | 10.9       | 23.5            |  |  |  |  |  |
| 4                                 | 39202849         |                        | 1.023       | 963108         | 985355               | 0.1487161   | 19.63          |             |           |            |            |                 |  |  |  |  |  |
| 6                                 | 40296154         |                        | 0.995       | 438559         | 436516               | 0.0658817   | 8.70           |             |           |            |            |                 |  |  |  |  |  |
| 8                                 | 41540129         |                        | 0.966       | 900066         | 869044               | 0.1311617   | 17.31          |             |           |            |            |                 |  |  |  |  |  |
| 10                                | 38903271         |                        | 1.031       | 445293         | 459087               | 0.0692884   | 9.15           |             |           |            |            |                 |  |  |  |  |  |

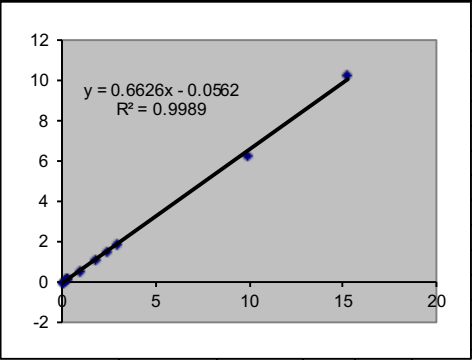

GS3  
Short term  
7 to 9 days on diet  
Study 3

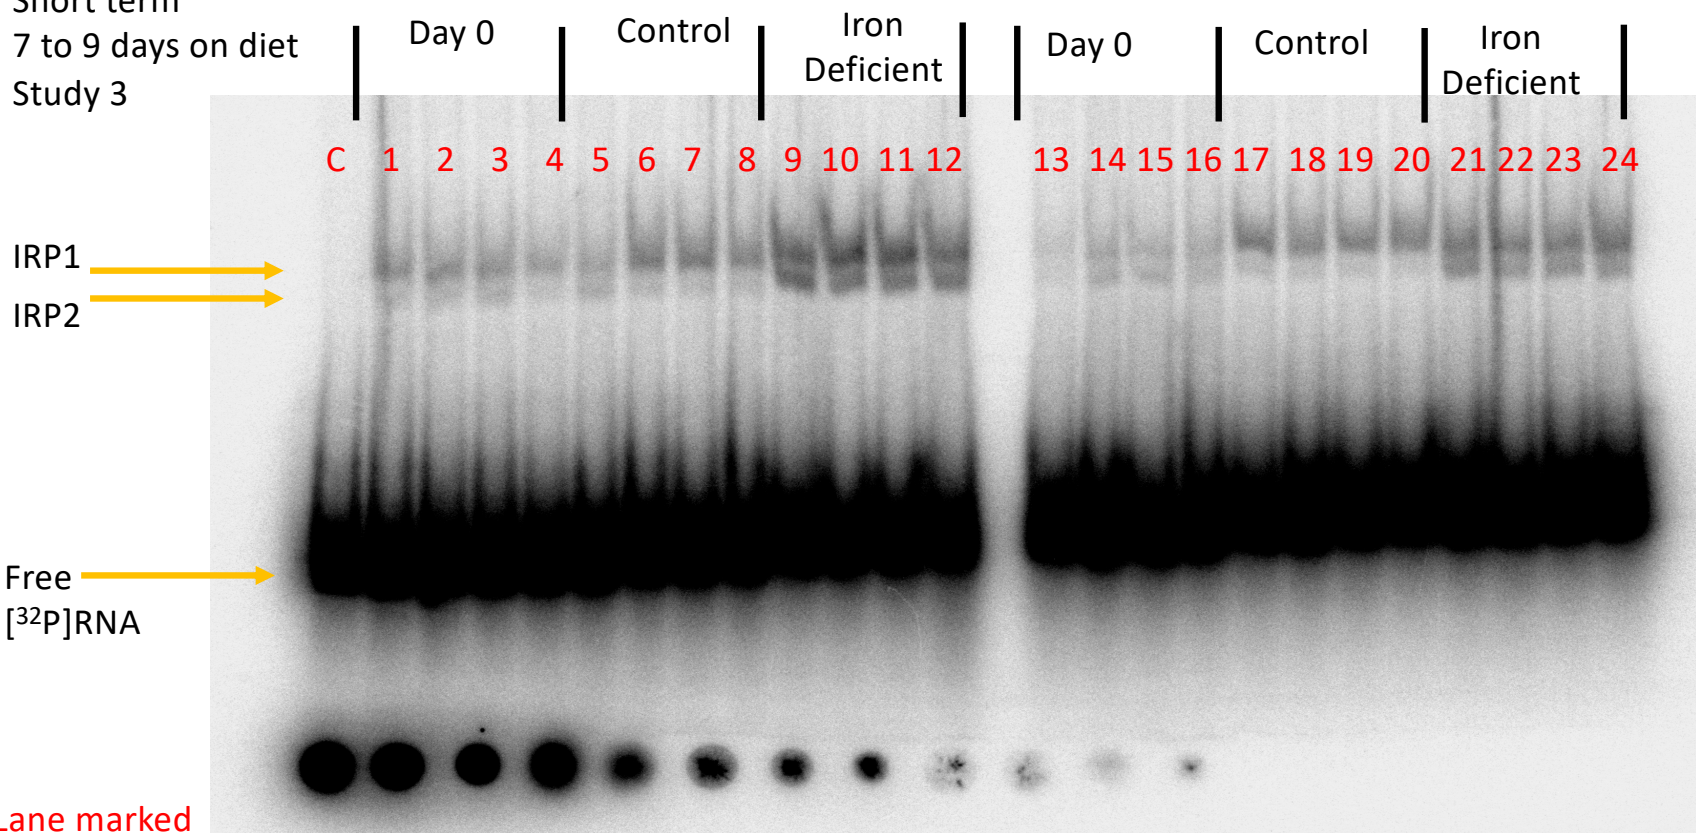

Lane marked C is RNA loaded alone without protein Standard curve for radioactivity

GS4  
Long term  
14 days on diet  
Study 2

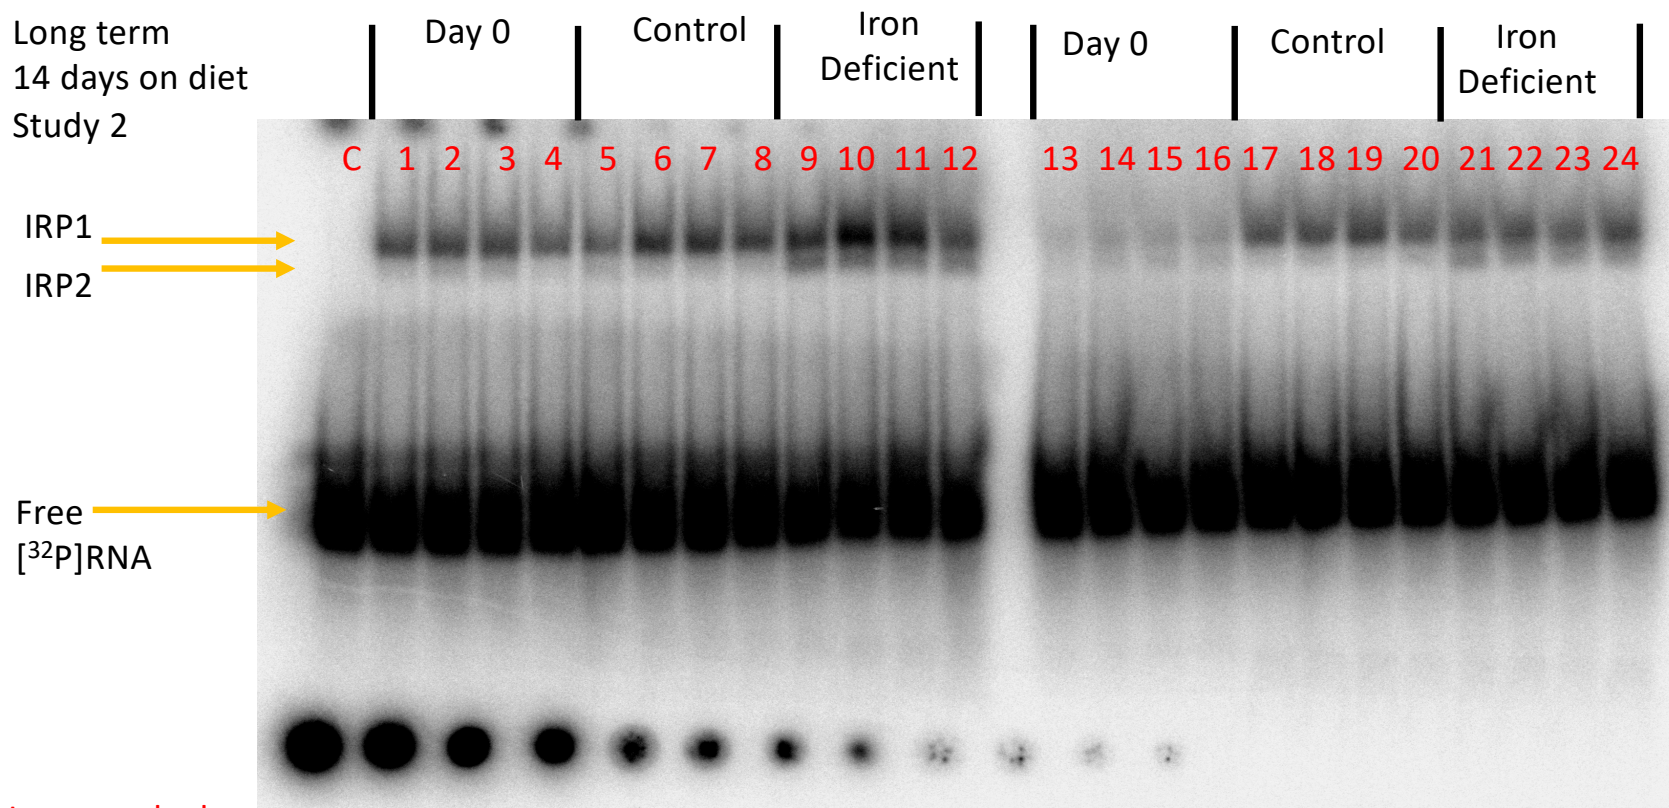

Lane marked C is RNA loaded alone without protein

Standard curve for radioactivity







| RNA BA Results (fmol of RNA bound/mg protein) |       |      |
|-----------------------------------------------|-------|------|
| <b>Short-Term</b>                             |       |      |
| <b>Spontaneous</b>                            |       |      |
| Sample                                        | Mean  | SEM  |
| Day0                                          | 73.8  | 6.5  |
| Control                                       | 79.8  | 7.4  |
| ID                                            | 210.8 | 11.5 |
| <b>Long-Term</b>                              |       |      |
| <b>Spontaneous</b>                            |       |      |
| Sample                                        | Mean  | SEM  |
| Day0                                          | 43.7  | 7.5  |
| Control                                       | 82.6  | 6.5  |
| ID                                            | 123.8 | 6.4  |
| <b>Short-Term</b>                             |       |      |
| <b>Total</b>                                  |       |      |
| Sample                                        | Mean  | SEM  |
| Day0                                          | 296.3 | 23.4 |
| Control                                       | 314.5 | 43.2 |
| ID                                            | 524.7 | 51.8 |
| <i>* This was very repeatable</i>             |       |      |
| <b>Long-Term</b>                              |       |      |
| <b>Total</b>                                  |       |      |
| Sample                                        | Mean  | SEM  |
| Day0                                          | 111.4 | 15.8 |
| Control                                       | 315.6 | 18.5 |
| ID                                            | 324.6 | 13.1 |

These results are the so-called spontaneous RNA binding activity - the active IRP in cells as isolated. This is what we report in the manuscript (as the sum of IRP1 + IRP2

These results are for the 2-mercaptoethanol activated binding
